# Supplementary material for: Sales in Commercial Alleys and Their Association with Air Pollution: Case Study in South Korea
Source: MDPI journal article supplement (doi:10.3390/su16020530), 2024-01-08
Supplement: s1 [file s1]

Archive with 1 entries (1 files):
- sustainability-2748338-supplementary.pdf
